# Supplementary material for: Comparison of the Pharmacokinetics and Pharmacodynamics of LY2963016 Insulin Glargine and EU- and US-Approved Versions of Lantus Insulin Glargine in Healthy Subjects: Three Randomized Euglycemic Clamp Studies
Source: Oxford University Press journal article supplement (doi:10.2337/dc14-2623), 2015-08-25
Supplement: dc142623supplementarydata.pdf [file dc142623supplementarydata.pdf]

## SUPPLEMENTARY DATA

### **Appendix - List of Participating Investigators**

Study comparing LY IGlAr to EU-approved IGlAr (NCT01476345): Maria M. Ferreira, MFamMed; PAREXEL International Bloemfontein Early Phase Unit, Bloemfontein, South Africa

Study comparing LY IGlAr to US-approved IGlAr (NCT01688635) and study comparing EU- to US-approved IGlAr (no trial registration number because the study does not involve an investigational product): Chew Lan Chong, MRCP, MSc; Lilly-NUS Centre for Clinical Pharmacology, Singapore, Singapore

### **Online-Only Supplemental Material**

Note to the editor: In order to condense the results of 3 Phase 1 trials into a single manuscript, it was necessary to focus on the most key data obtained during the trials. These supplemental materials are therefore provided in the interests of transparency, to allow the interested reader to access additional trial data not included in the main manuscript and to satisfy principles of honesty, openness, and integrity in the publication of clinical trial data.

SUPPLEMENTARY DATA

**Supplementary Figure S1.** Mean ( $\pm$ Standard Deviation) C-peptide Concentrations following Subcutaneous Administration of 0.5 U/kg LY IGLar, EU-approved IGLar, or US-approved IGLar

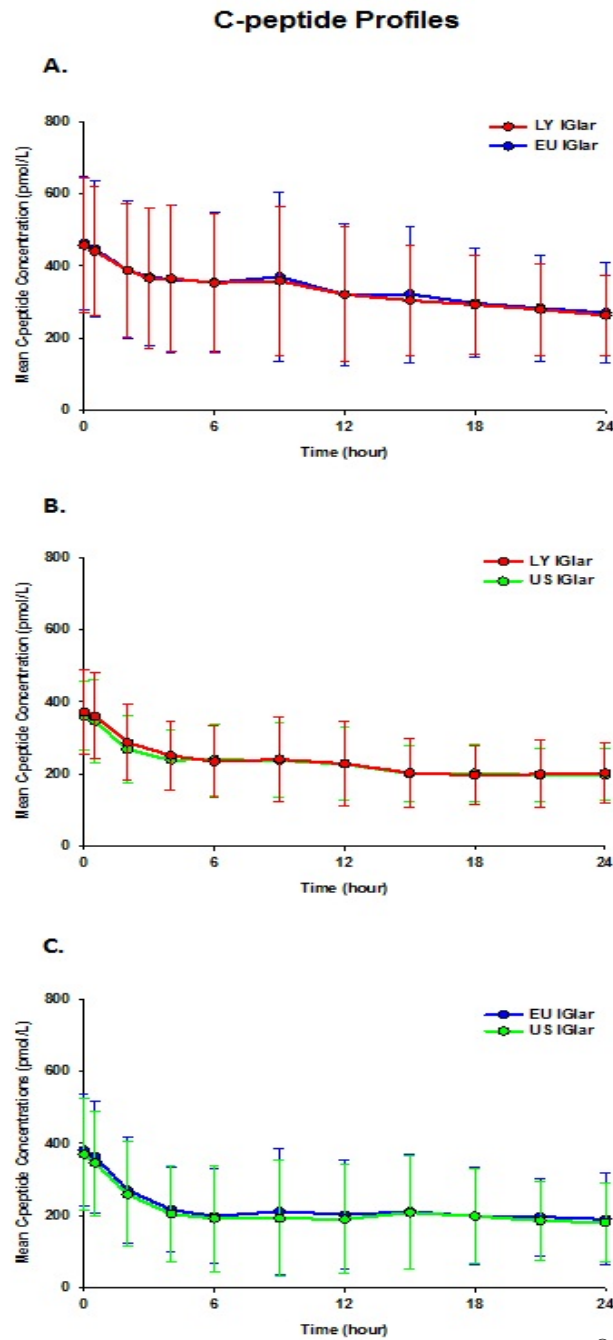

Abbreviations: EU = European Union; IGLar = insulin glargine (Lantus<sup>®</sup>); LY IGLar = LY2963016; US = United States.

SUPPLEMENTARY DATA

**Supplementary Figure S2.** Mean ( $\pm$ Standard Deviation) Serum Insulin Concentrations (no C-peptide Correction) following Subcutaneous Administration of 0.5 U/kg LY IGLar, EU-approved IGLar, or US-approved IGLar

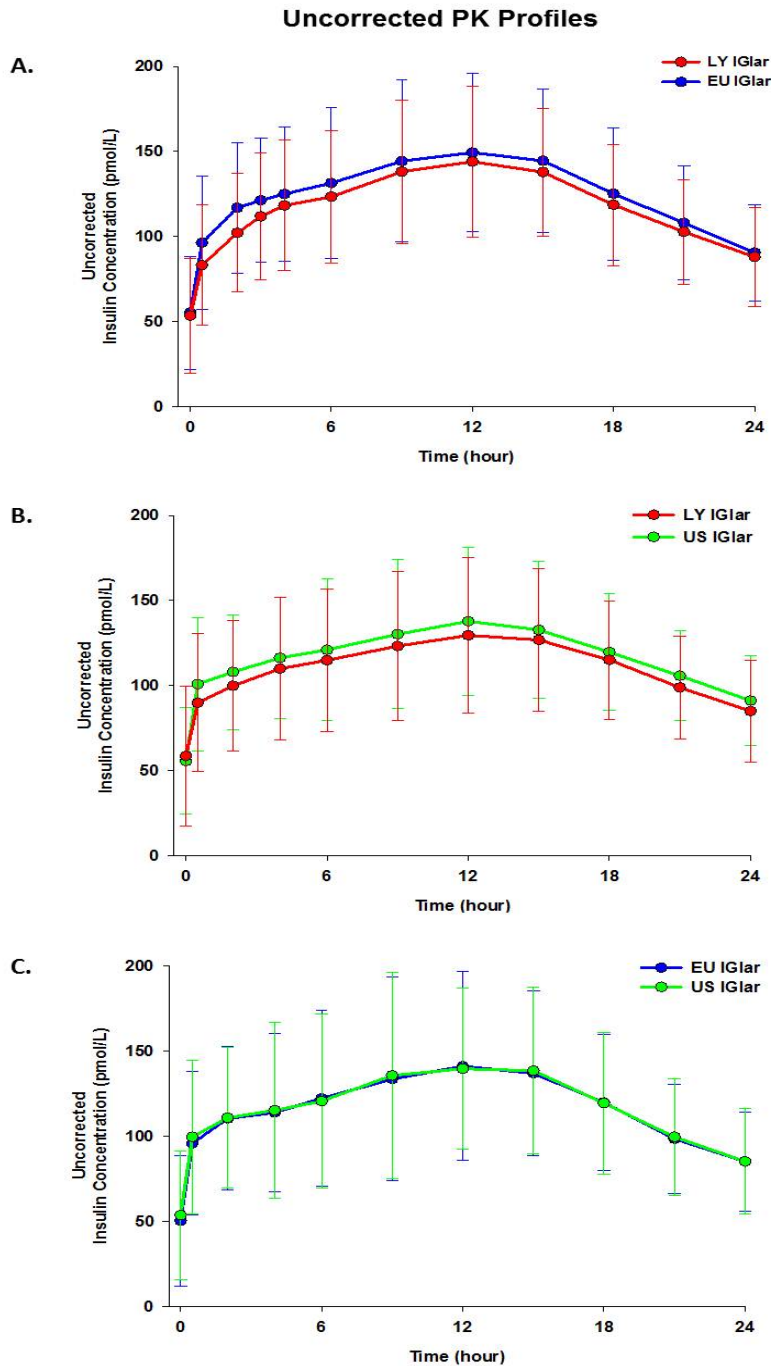

Abbreviations: EU = European Union; IGLar = insulin glargine (Lantus<sup>®</sup>); LY IGLar = LY2963016; PK = pharmacokinetic; US = United States.

Plots of mean serum insulin (LY IGLar or IGLar [Lantus<sup>®</sup>]) concentration in the 24 hours following 0.5-U/kg SC administration of 3 insulin glargine products (Plots A, B, and C are from 3 separate studies conducted in separate groups of subjects).

SUPPLEMENTARY DATA

**Supplementary Table S1.** Summary of the Secondary Pharmacokinetic Parameters of LY IGl<sub>ar</sub>, EU-approved IGl<sub>ar</sub>, and US-approved IGl<sub>ar</sub>

| <b>Treatment<br/>(0.5 U/kg)</b> | <b>Geometric Mean<br/>(CV%)</b> | <b>N</b> |
|---------------------------------|---------------------------------|----------|
| <b>AUC(0-∞) (pmol·h/L)</b>      |                                 |          |
| LY IGl <sub>ar</sub>            | 2590 (46)                       | 88       |
| US IGl <sub>ar</sub>            | 3060 (46)                       | 89       |
| LY IGl <sub>ar</sub>            | 2830 (39)                       | 80       |
| EU IGl <sub>ar</sub>            | 2930 (41)                       | 80       |
| EU IGl <sub>ar</sub>            | 2890 (44)                       | 40       |
| US IGl <sub>ar</sub>            | 2950 (44)                       | 40       |
| <b>t<sub>1/2</sub> (h)</b>      |                                 |          |
| LY IGl <sub>ar</sub>            | 10.0 (59)                       | 88       |
| US IGl <sub>ar</sub>            | 11.6 (69)                       | 89       |
| LY IGl <sub>ar</sub>            | 9.95 (66)                       | 80       |
| EU IGl <sub>ar</sub>            | 9.76 (61)                       | 80       |
| EU IGl <sub>ar</sub>            | 9.35 (62)                       | 40       |
| US IGl <sub>ar</sub>            | 9.52 (46)                       | 40       |
| <b>CL/F (L/h)</b>               |                                 |          |
| LY IGl <sub>ar</sub>            | 81.0 (49)                       | 88       |
| US IGl <sub>ar</sub>            | 68.4 (48)                       | 89       |
| LY IGl <sub>ar</sub>            | 78.5 (46)                       | 80       |
| EU IGl <sub>ar</sub>            | 75.8 (45)                       | 80       |
| EU IGl <sub>ar</sub>            | 69.3 (47)                       | 40       |
| US IGl <sub>ar</sub>            | 67.6 (43)                       | 40       |
| <b>V<sub>z</sub>/F (L)</b>      |                                 |          |
| LY IGl <sub>ar</sub>            | 1170 (58)                       | 88       |
| US IGl <sub>ar</sub>            | 1140 (55)                       | 89       |
| LY IGl <sub>ar</sub>            | 1130 (58)                       | 80       |
| EU IGl <sub>ar</sub>            | 1070 (58)                       | 80       |
| EU IGl <sub>ar</sub>            | 935 (50)                        | 40       |
| US IGl <sub>ar</sub>            | 929 (46)                        | 40       |

Abbreviations: AUC(0-∞) = area under the concentration-time curve from zero to infinity; CL/F = total body clearance of drug calculated after extra-vascular administration; CV% = coefficient of variation; EU = European Union; IGl<sub>ar</sub> = insulin glargine (Lantus®); LY IGl<sub>ar</sub> = LY2963016; N = number of subjects; t<sub>1/2</sub> = half-life associated with the terminal rate constant in noncompartmental analysis; US = United States; V<sub>z</sub>/F = apparent volume of distribution during the terminal phase after extra-vascular administration.

SUPPLEMENTARY DATA

**Supplementary Table S2.** Summary of the Secondary Pharmacodynamic Parameters of LY IGl<sub>ar</sub>, EU-approved IGl<sub>ar</sub>, and US-approved IGl<sub>ar</sub>

| <b>Treatment (0.5 U/kg)</b>            | <b>Median</b> | <b>Range</b> |
|----------------------------------------|---------------|--------------|
| <b>TR<sub>max</sub> (h)</b>            |               |              |
| LY IGl <sub>ar</sub>                   | 12.0          | 3.00 - 24.0  |
| US IGl <sub>ar</sub>                   | 12.9          | 3.30 - 24.0  |
| LY IGl <sub>ar</sub>                   | 11.4          | 0.50 - 17.9  |
| EU IGl <sub>ar</sub>                   | 11.1          | 0.60 - 17.6  |
| EU IGl <sub>ar</sub>                   | 13.3          | 4.30 - 24.0  |
| US IGl <sub>ar</sub>                   | 13.6          | 3.90 - 24.0  |
| <b>T<sub>onset</sub> (h)</b>           |               |              |
| LY IGl <sub>ar</sub>                   | 2.10          | 0.22 - 9.77  |
| US IGl <sub>ar</sub>                   | 1.70          | 0.28 - 23.3  |
| LY IGl <sub>ar</sub>                   | 0.81          | 0.10 - 3.33  |
| EU IGl <sub>ar</sub>                   | 0.83          | 0.08 - 3.50  |
| EU IGl <sub>ar</sub>                   | 2.13          | 0.42 - 13.4  |
| US IGl <sub>ar</sub>                   | 1.87          | 0.53 - 9.05  |
| <b>Early TR<sub>max50%</sub> (h)</b>   |               |              |
| LY IGl <sub>ar</sub>                   | 5.46          | 1.14 - 19.8  |
| US IGl <sub>ar</sub>                   | 4.66          | 1.67 - 23.2  |
| LY IGl <sub>ar</sub>                   | 3.13          | 0.19 - 9.21  |
| EU IGl <sub>ar</sub>                   | 2.84          | 0.25 - 8.42  |
| EU IGl <sub>ar</sub>                   | 5.17          | 1.99 - 20.0  |
| US IGl <sub>ar</sub>                   | 5.29          | 1.32 - 19.8  |
| <b>Late TR<sub>max50%</sub> (h)</b>    |               |              |
| LY IGl <sub>ar</sub>                   | 18.8          | 6.87 - 23.9  |
| US IGl <sub>ar</sub>                   | 18.8          | 6.62 - 24.0  |
| LY IGl <sub>ar</sub>                   | 21.1          | 1.28 - 24.0  |
| EU IGl <sub>ar</sub>                   | 22.0          | 1.63 - 24.0  |
| EU IGl <sub>ar</sub>                   | 19.7          | 8.47 - 24.0  |
| US IGl <sub>ar</sub>                   | 19.7          | 4.46 - 23.8  |
| <b>T<sub>last</sub> (h)</b>            |               |              |
| LY IGl <sub>ar</sub>                   | 24.0          | 13.9 - 24.2  |
| US IGl <sub>ar</sub>                   | 24.0          | 11.7 - 24.1  |
| LY IGl <sub>ar</sub>                   | 23.8          | 23.3 - 24.0  |
| EU IGl <sub>ar</sub>                   | 23.8          | 21.0 - 24.0  |
| EU IGl <sub>ar</sub>                   | 24.0          | 20.0 - 24.1  |
| US IGl <sub>ar</sub>                   | 24.0          | 22.5 - 24.1  |
| <b>GIR<sub>last</sub> (mg/kg/min)*</b> |               |              |
| LY IGl <sub>ar</sub>                   | 0.950         | 79           |
| US IGl <sub>ar</sub>                   | 1.05          | 73           |
| LY IGl <sub>ar</sub>                   | 1.06          | 86           |
| EU IGl <sub>ar</sub>                   | 1.15          | 86           |
| EU IGl <sub>ar</sub>                   | 0.828         | 149          |
| US IGl <sub>ar</sub>                   | 0.751         | 138          |

Abbreviations: early TR<sub>max50%</sub> = time to 50% maximal GIR before TR<sub>max</sub>; GIR = glucose infusion rate; GIR<sub>last</sub> = value of last measurable GIR; late TR<sub>max50%</sub> = time to 50% maximal GIR after TR<sub>max</sub>; T<sub>last</sub> = time of last measurable GIR; Tonset = time of first change of GIR postdose; TR<sub>max</sub> =

## SUPPLEMENTARY DATA

time to maximum GIR.

\* Geometric mean (coefficient of variation)
